# Supplementary material
Source: publisher site journal article supplement (https://www.dovepress.com/article/439862)
Supplement: Supplementary file 1 [file get_supplementary_file.php]

**Train 1**

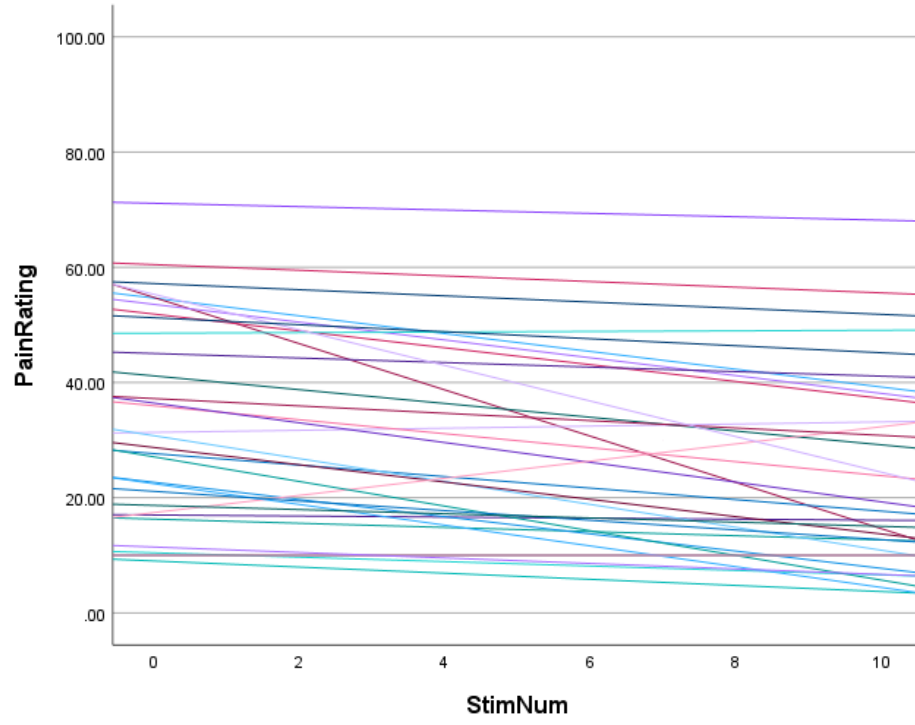

**Train 2**

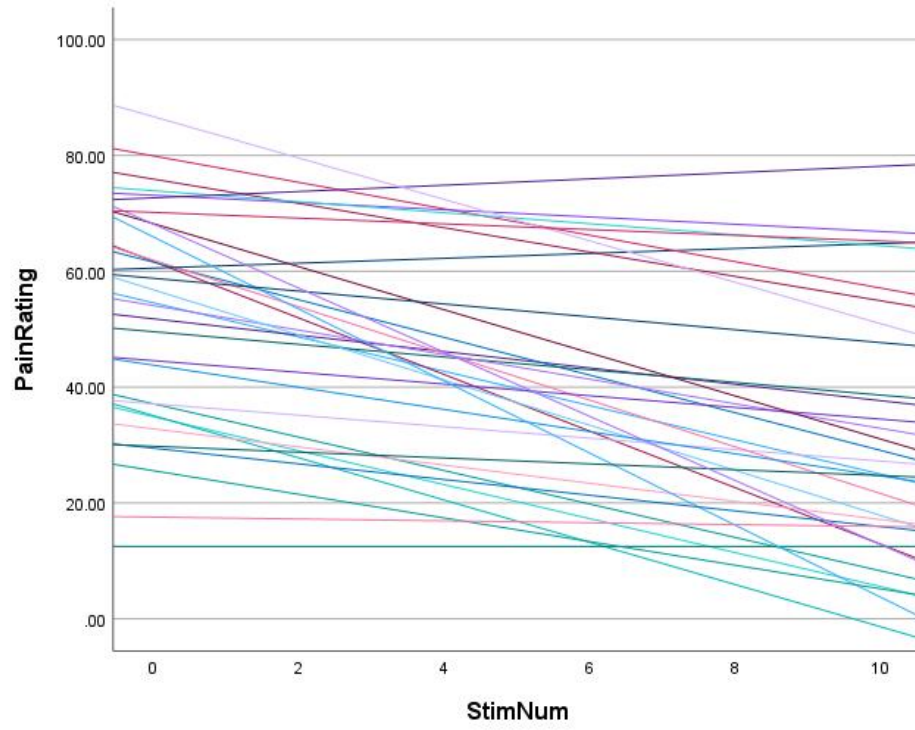

**Train 3**

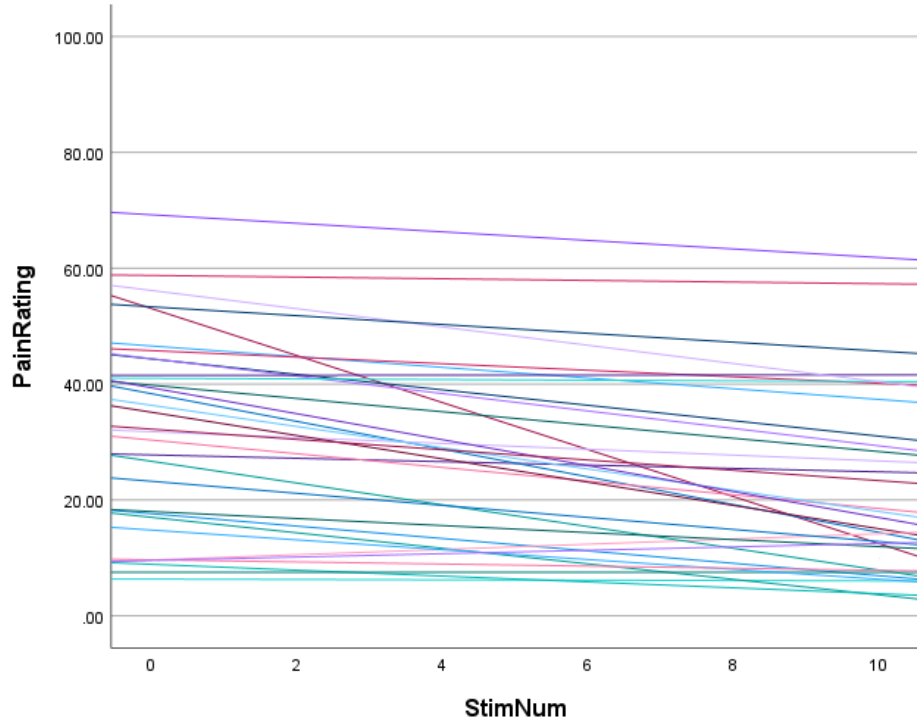

**Train 4**

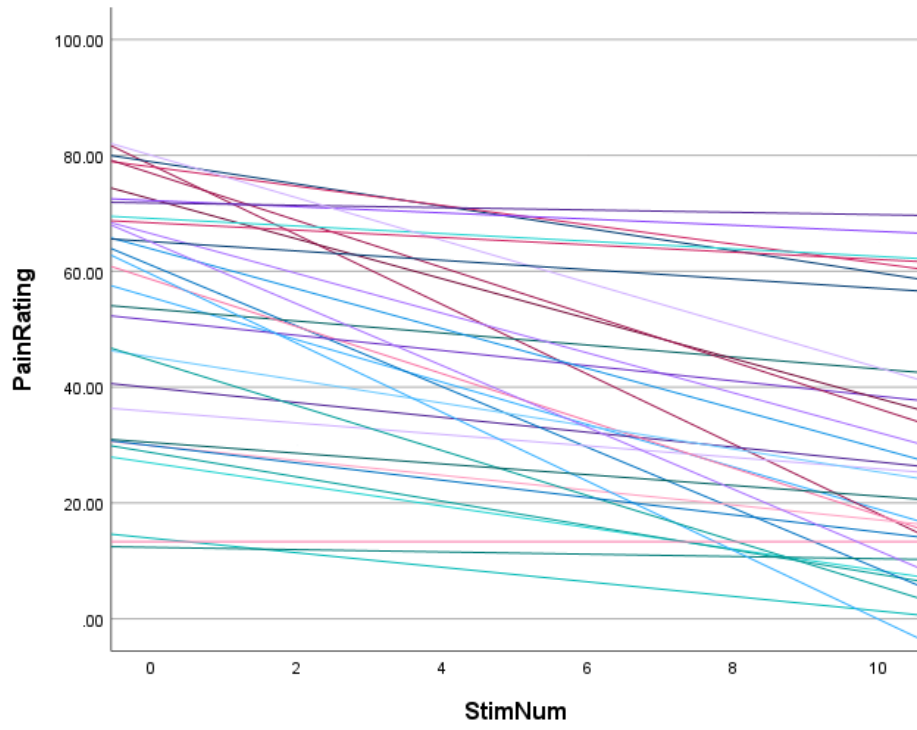

**Train 5**

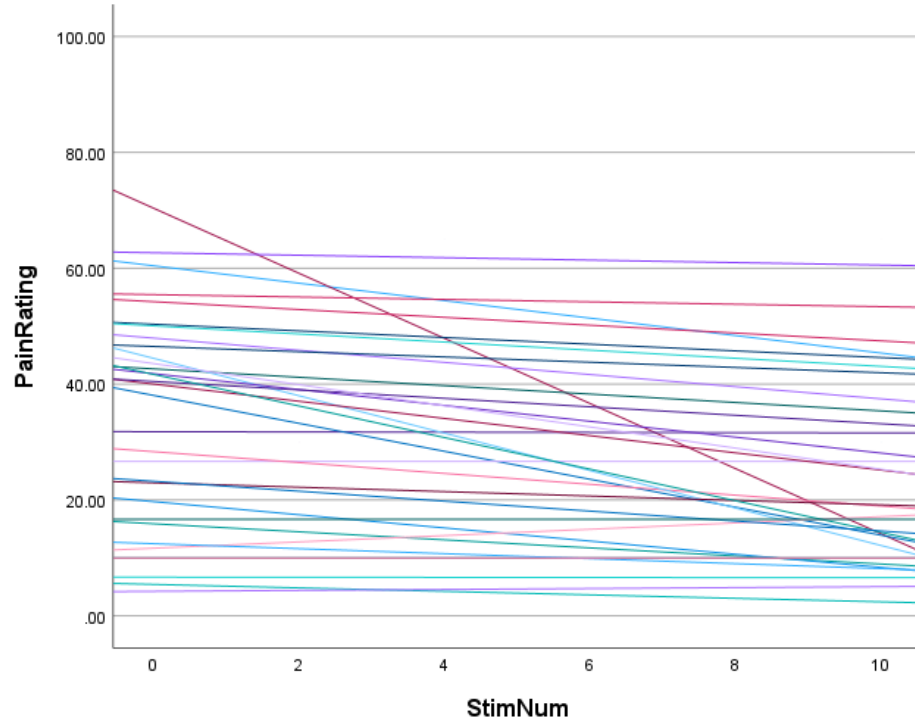

**Train 6**

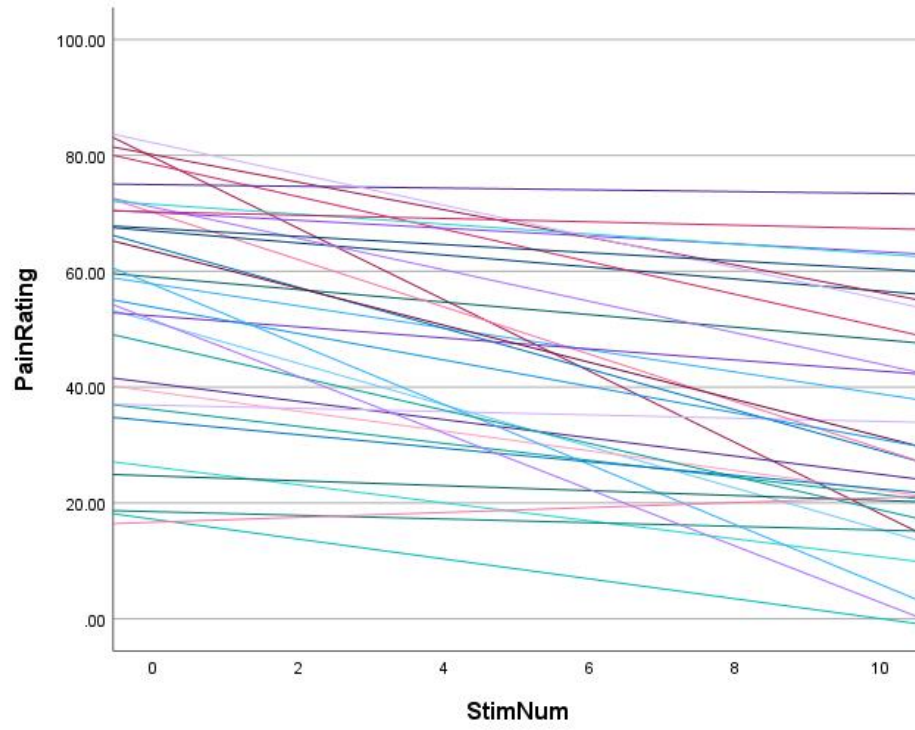

**Train 7**

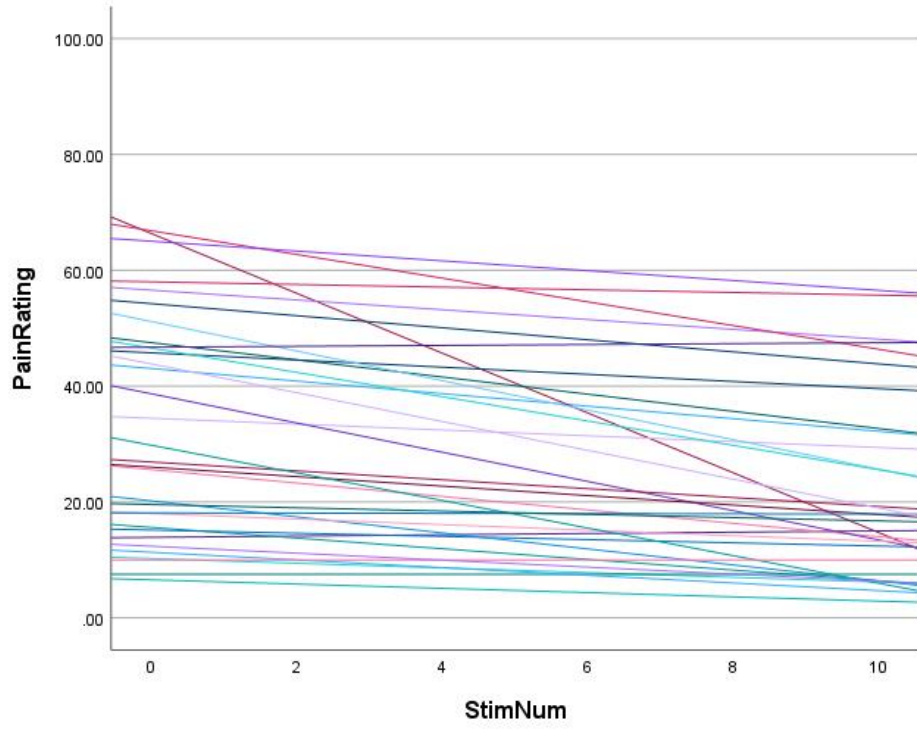

**Train 8**

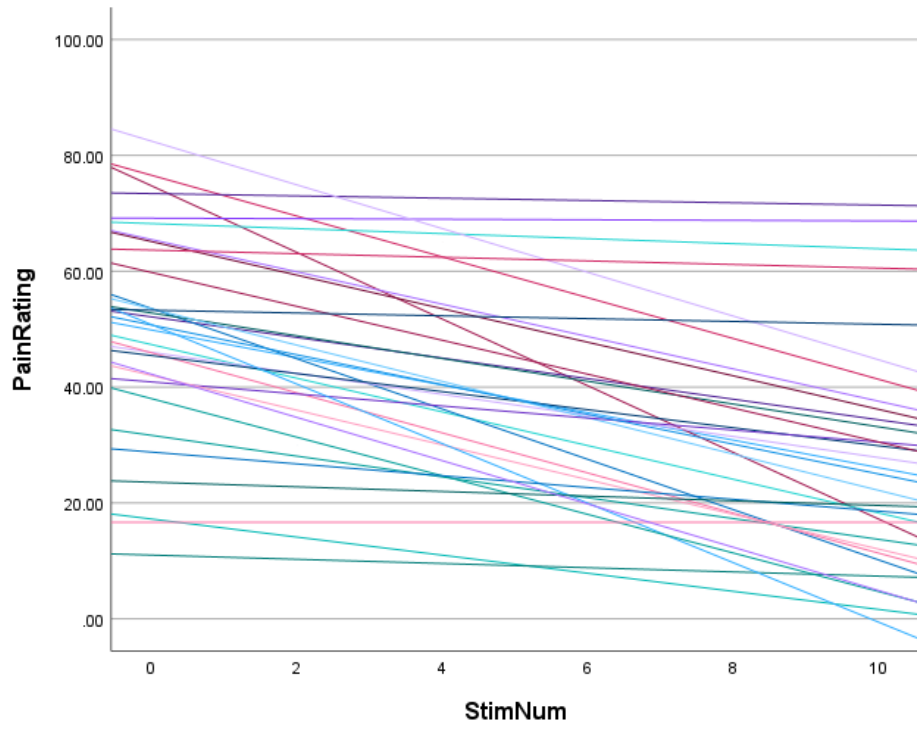

Train 9

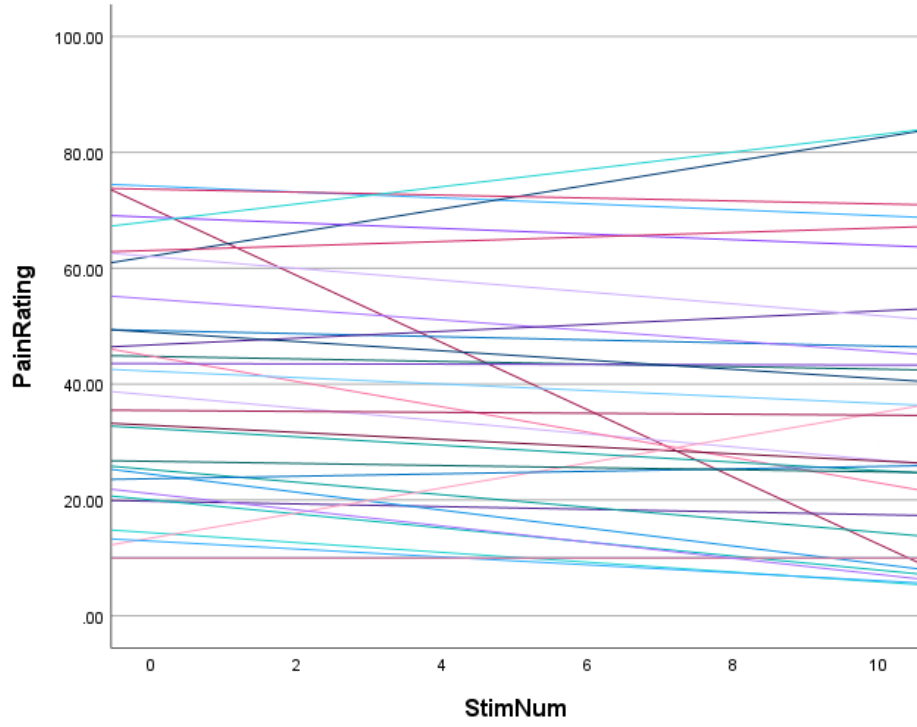

Train 10

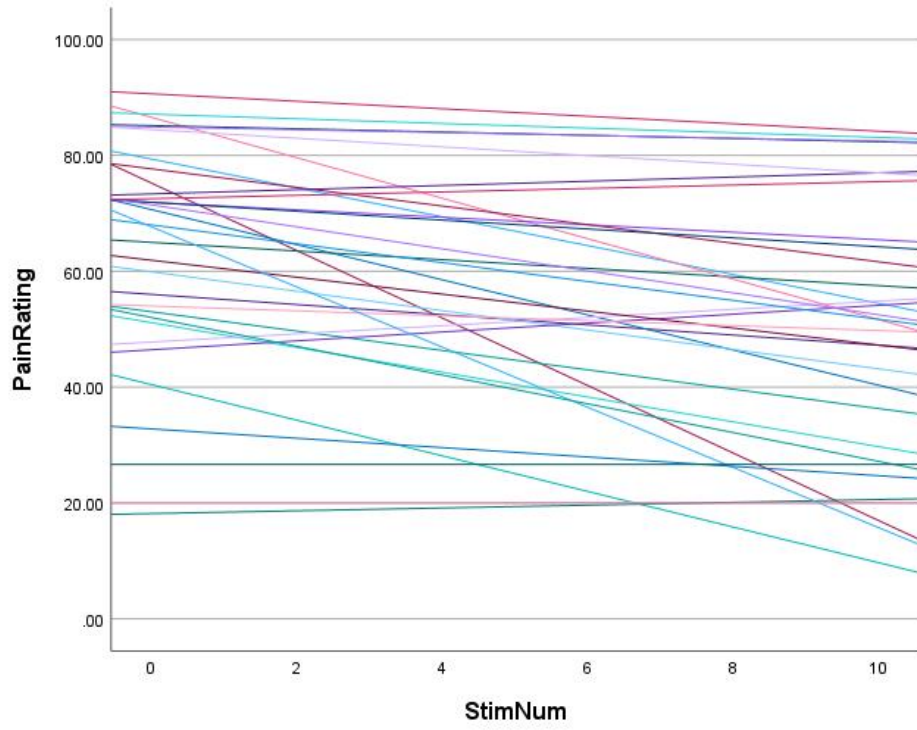

**Train 11**

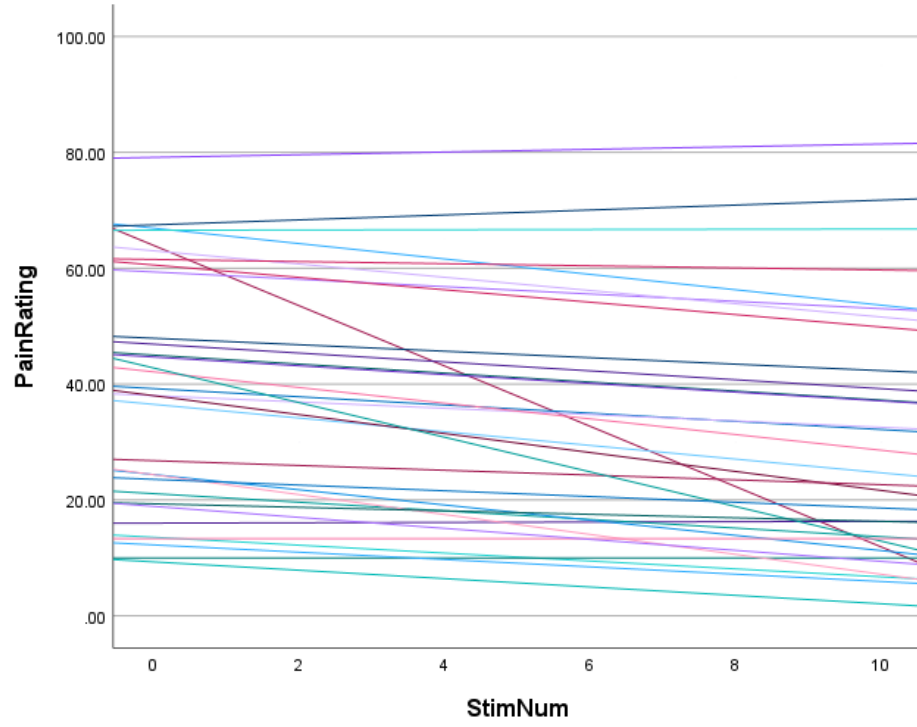

**Train 12**

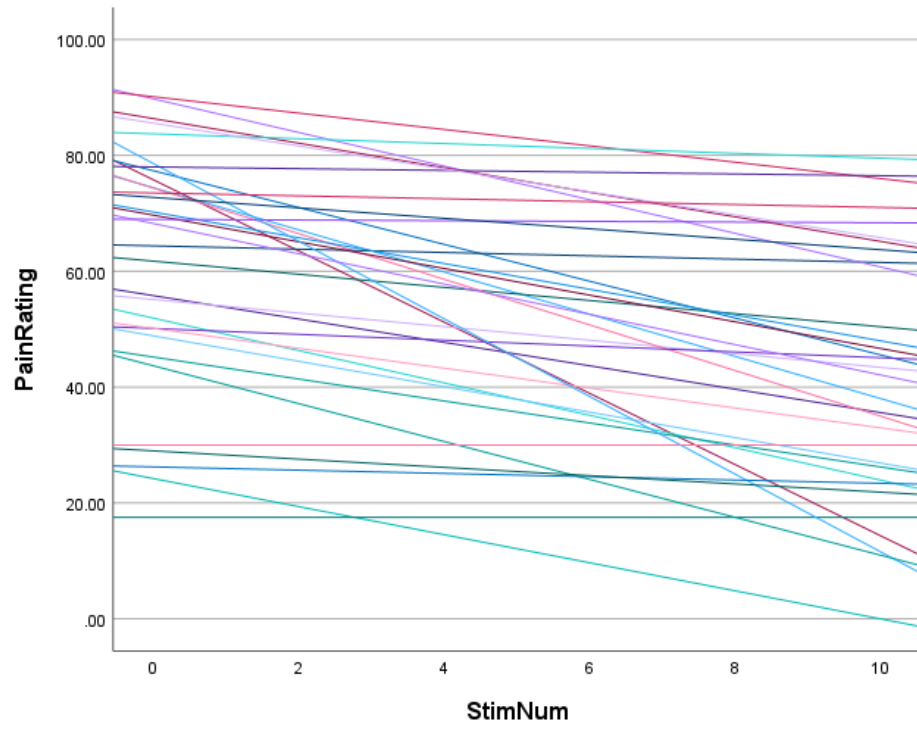

**Train 13**

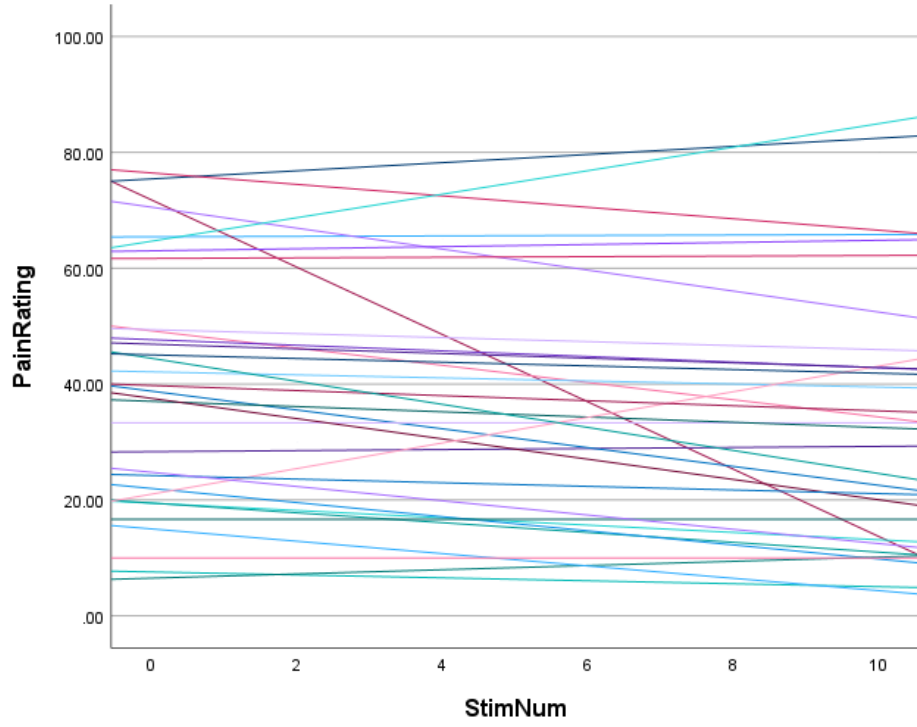

**Train 14**

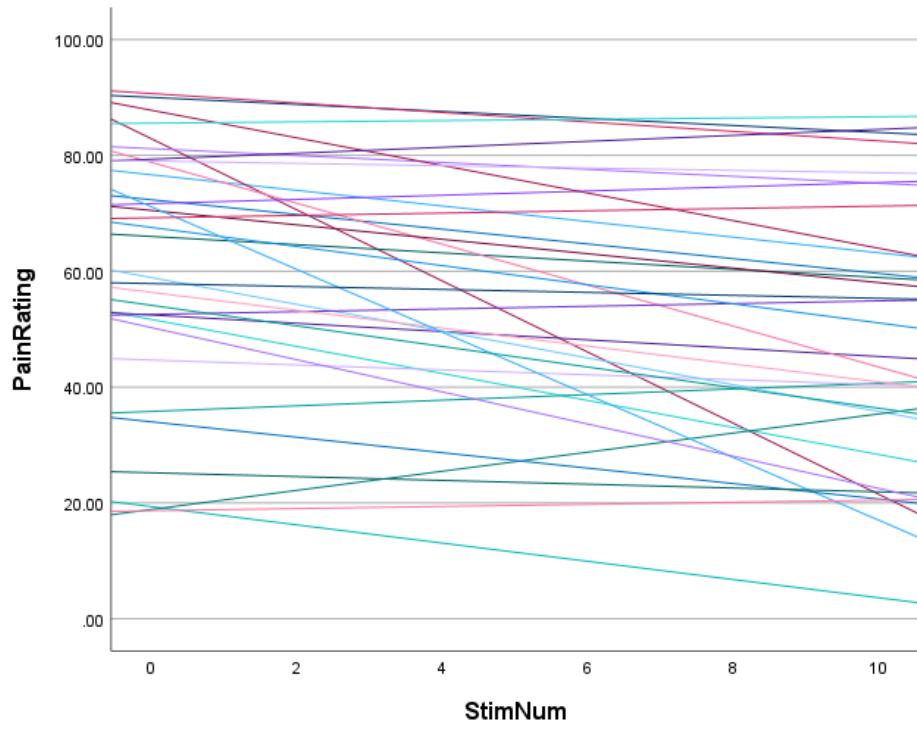

**Train 15**

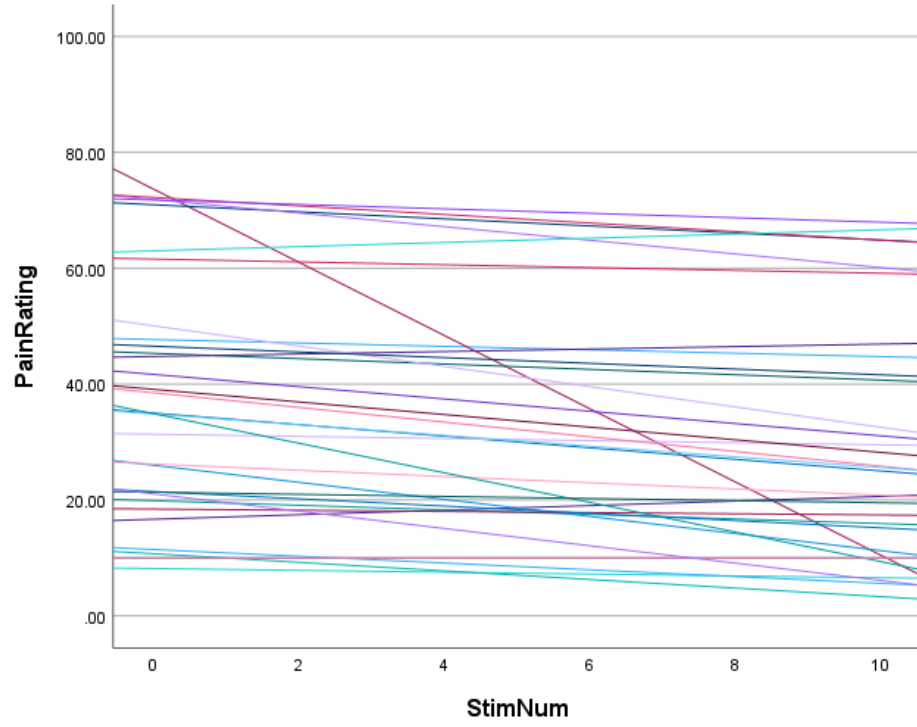

**Train 16**

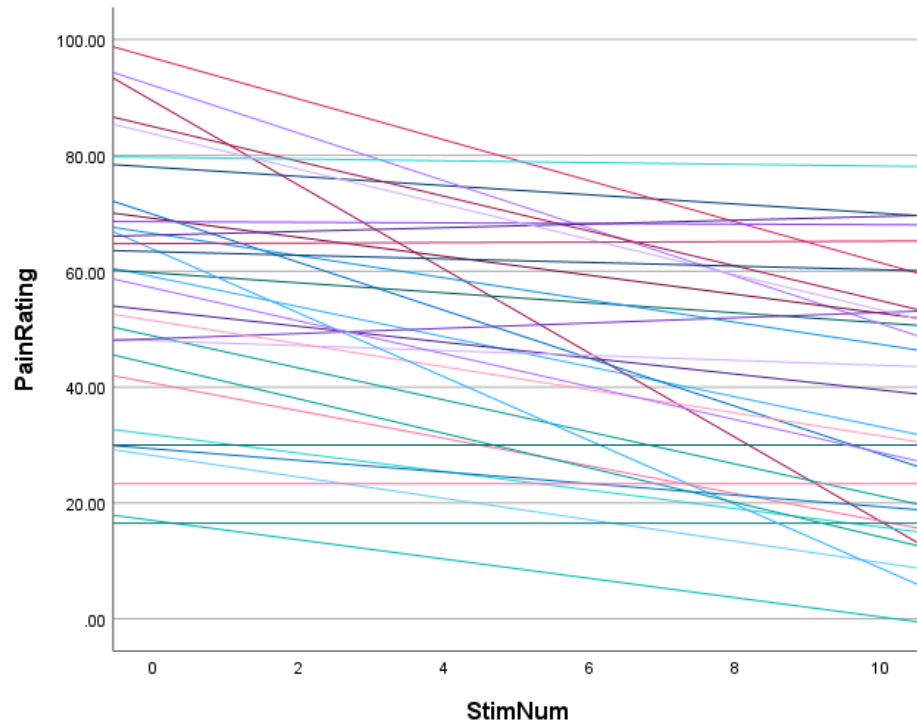



**Train 17**

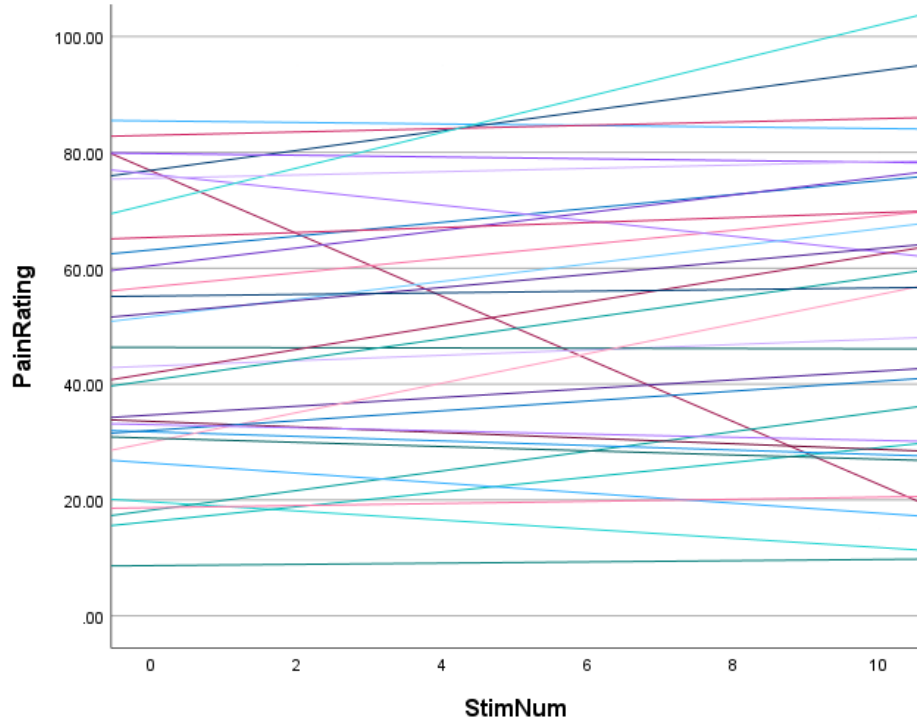

**Train 18**

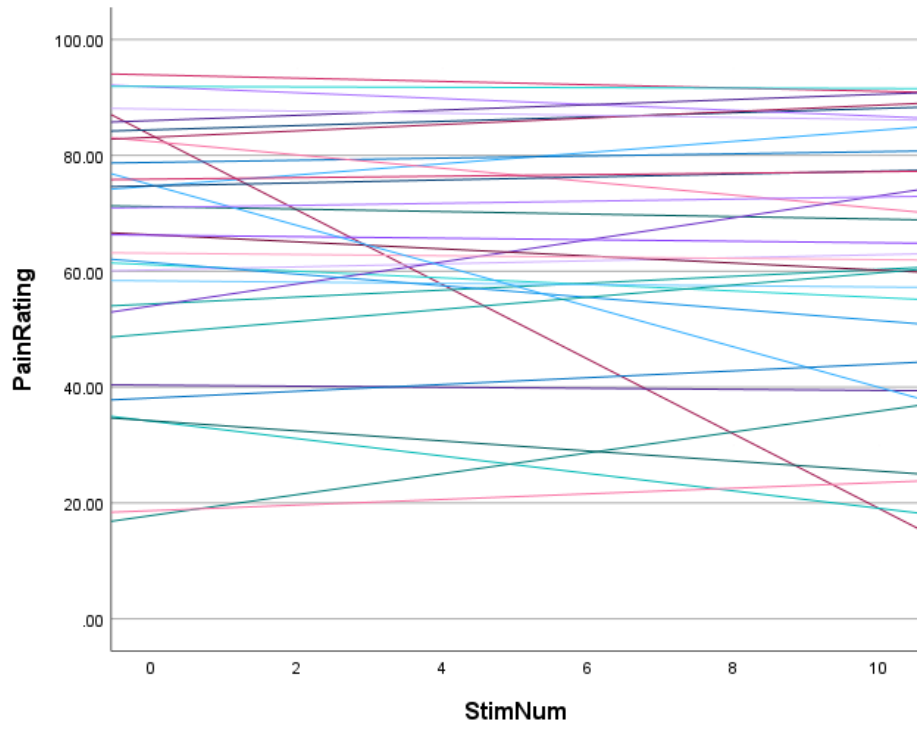

Train 19

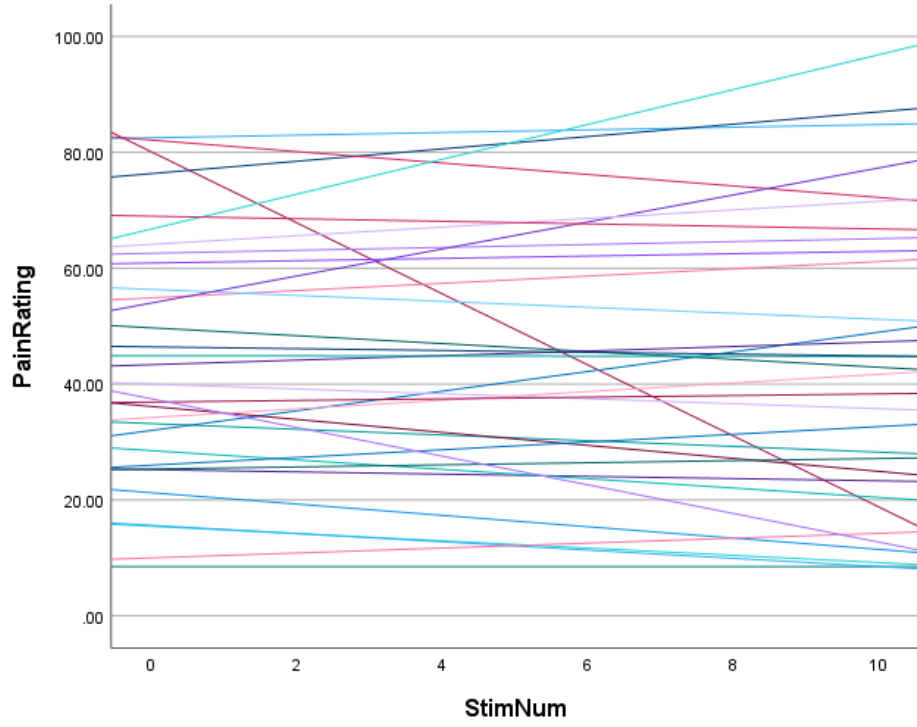

Train 20

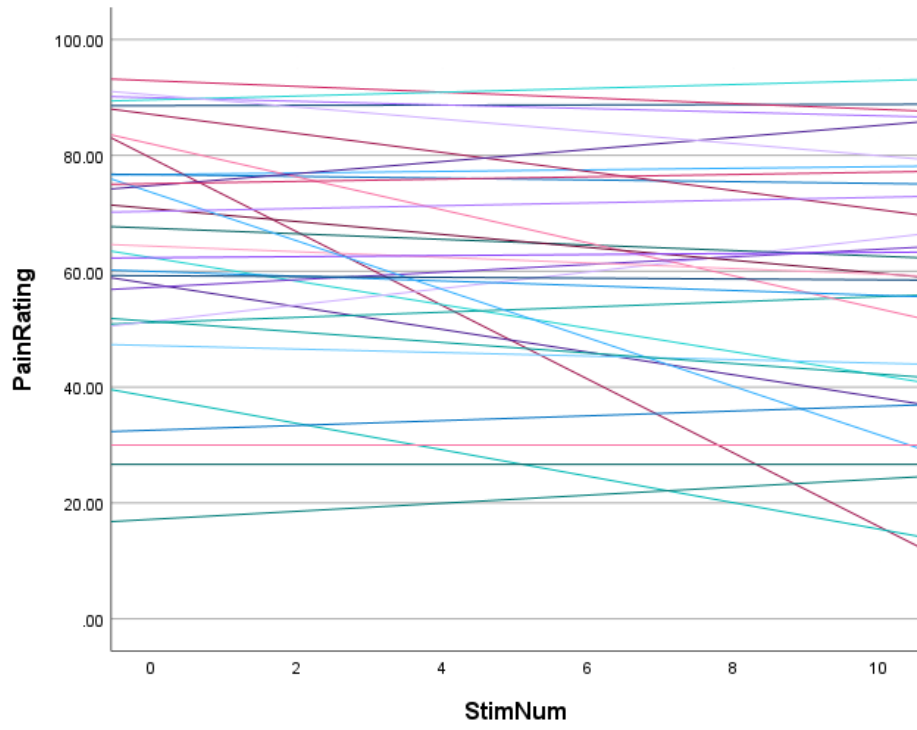

Train 21

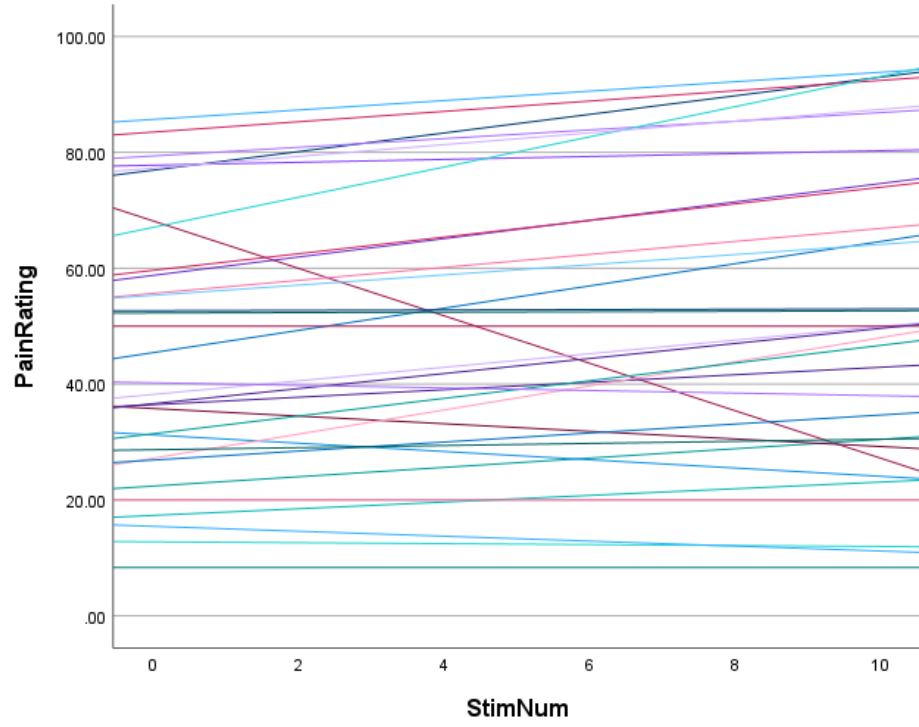

Train 22

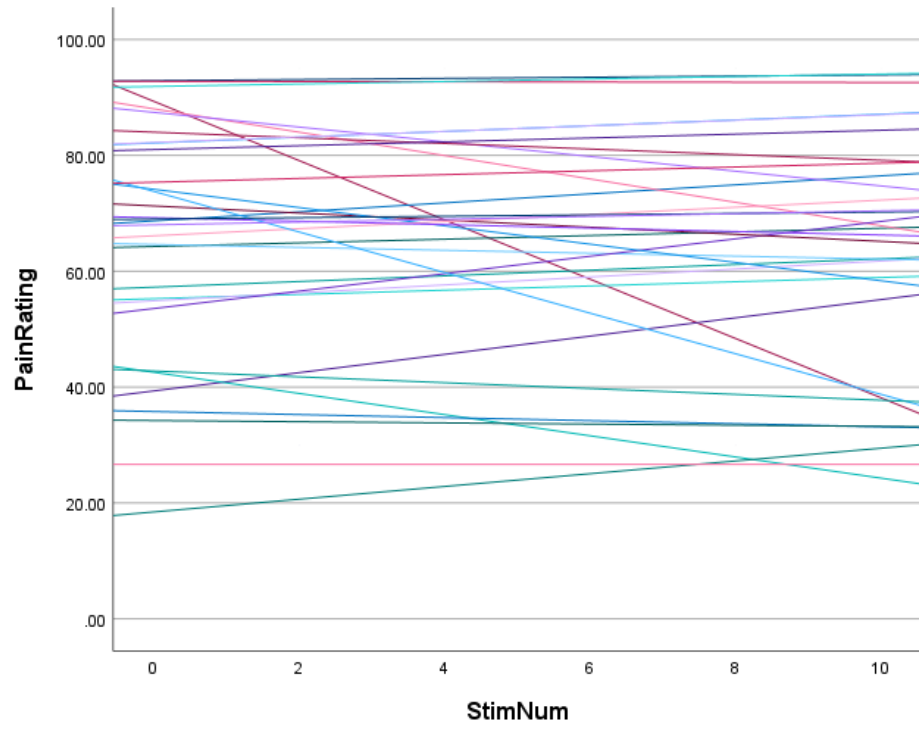

**Train 23**

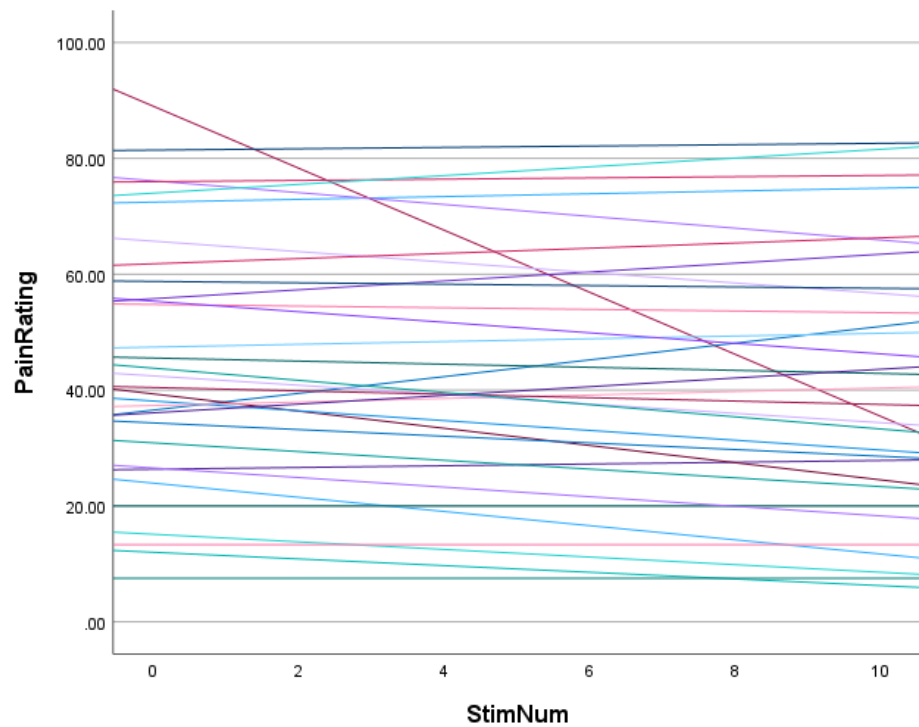

**Train 24**

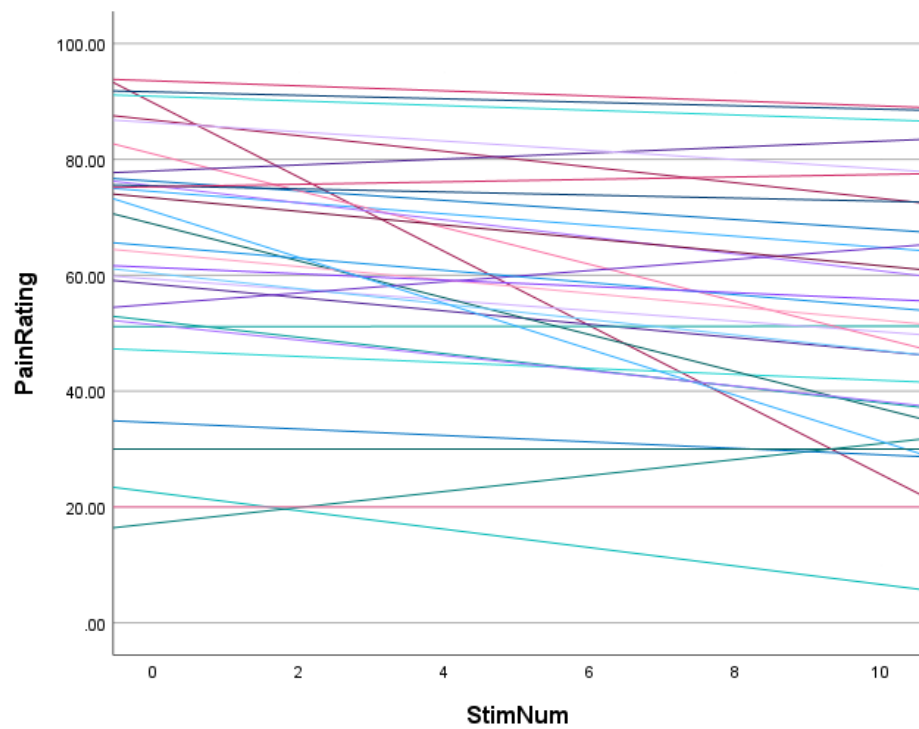

## Figure Legends

**Supplemental Figure 1.** Person-level plots of temporal summation slopes for each stimulation train.
